# Supplementary material for: Influence of gas-to-liquid (GTL) fuel in the combined blend of Jatropha biodiesel and diesel: an analysis of engine combustion–performance–emission parameters
Source: Royal Society of Chemistry journal article supplement (doi:10.1039/c4ra15548c), 2015-01-01
Supplement: c4ra15548c1.pdf [file c4ra15548c1.pdf]

**Table 1: GC panel and operating conditions**

| <b>Property</b>               | <b>Specifications</b>                                                   |
|-------------------------------|-------------------------------------------------------------------------|
| <b>Carrier gas</b>            | Helium, 83Kpa (split ratio 50:1)                                        |
| <b>GC column</b>              | BPX70, capillary type (30.0 m x 0.25 $\mu$ m x 0.32 mm, inner diameter) |
| <b>GC column flow rate</b>    | 1.10ml/min                                                              |
| <b>Injector</b>               | Split/split less (type 1177) with EFC control                           |
| <b>Injection volume</b>       | 1 $\mu$ L                                                               |
| <b>Detector type</b>          | Flame ionization detector (FID), 250.0 °C                               |
| <b>Operating temperatures</b> |                                                                         |
| <b>Oven</b>                   | 140.0 °C                                                                |
| <b>Injector</b>               | 240.0 °C                                                                |
| <b>Detector ports</b>         | 260.0 °C                                                                |
| <b>Initial hold</b>           | 140.0 °C (hold for 2 minutes)                                           |
| <b>Temperature ramp</b>       | 8°C/min to 165.0 °C                                                     |
| <b>(after initial hold)</b>   | 3°C/min to 192.0 °C                                                     |
|                               | 8°C/min to 220.0 °C                                                     |

**Table 2: Equipment for Fuel property testing**

| <b>Properties</b> | <b>Equipment</b> | <b>Manufact<br/>urer</b> | <b>Standard<br/>method</b> | <b>ASTM<br/>D6751</b> | <b>Accuracy</b> |
|-------------------|------------------|--------------------------|----------------------------|-----------------------|-----------------|
|-------------------|------------------|--------------------------|----------------------------|-----------------------|-----------------|

|                            |                                               |                             |       | <b>limit</b>  |                         |
|----------------------------|-----------------------------------------------|-----------------------------|-------|---------------|-------------------------|
| <b>Kinematic viscosity</b> | SVM 3000-automatic                            | Anton Paar, UK              | D445  | 1.9-6.0       | ± 0.35%                 |
| <b>Density</b>             | SVM 3000-automatic                            | Anton Paar, UK              |       | Not specified | ± 0.1 kg/m <sup>3</sup> |
| <b>Flash point</b>         | Pensky-martens flash point-automatic NPM 440  | Normalab, France            | D93   | 130 min       | ± 0.1°C                 |
| <b>Calorific value</b>     | C2000 basic calorimeter-automatic             | IKA, UK                     | D240  | D6371         | ± 0.1 % of reading      |
| <b>Oxidation stability</b> | 873 Rancimat—automatic                        | Metrohm, Switzerland        | D675  | 3 hour        | ±0.01 hour              |
| <b>Cloud point</b>         | Cloud and Pour point tester—automatic NTE 450 | Normalab, France            | D2500 | Report        | ±0.1°C                  |
| <b>Pour point</b>          | Cloud and Pour point tester—automatic NTE 450 | Normalab, France            | D2500 | Not specified | ±0.1°C                  |
| <b>CFPP</b>                | Cold filter plugging point—automatic NTL 450  | Normalab, France            | D6371 | Not specified | ±0.1°C                  |
| <b>Acid value</b>          | G-20 Rondolino automated titration system     | Mettler Toledo, Switzerland | D664  | 0.5 max       | ±0.001 mg KOH/g         |

**Table 3: Engine Specification**

|                            |                               |
|----------------------------|-------------------------------|
| <b>Engine type</b>         | <b>4 Stroke diesel engine</b> |
| <b>Number of cylinders</b> | 4 in-line, longitudinal       |

|                                               |                                     |
|-----------------------------------------------|-------------------------------------|
| <b>Cylinder bore * stroke</b>                 | 91.1 x 95 mm                        |
| <b>Displacement</b>                           | 2477 cc                             |
| <b>Compression ratio</b>                      | 21:1                                |
| <b>Combustion chamber</b>                     | Swirl type                          |
| <b>Rated Power</b>                            | 65 kW at 4200 rpm                   |
| <b>Torque</b>                                 | 185 Nm, at 2,000 rpm                |
| <b>Valve mechanism</b>                        | Single overhead camshaft (SOHC)     |
| <b>Injection pressure (kg/cm<sup>2</sup>)</b> | 157 bar                             |
| <b>Aspiration</b>                             | Turbo charged                       |
| <b>Fuel system</b>                            | Distributor type injection pump     |
| <b>Cooling system</b>                         | Radiator cooling                    |
| <b>Lubrication system</b>                     | Pressure feed, full flow filtration |

**Table 4 : Specification of Exhaust Gas Analyzer**

|                                 | <b>Method</b>           | <b>Measured component</b> | <b>Range</b>    | <b>Resolution</b> |
|---------------------------------|-------------------------|---------------------------|-----------------|-------------------|
| <b>AVL Exhaust Gas Analyser</b> | Non-dispersive infrared | CO                        | 0.10% vol.      | 0.01 vol.%        |
|                                 | Non-dispersive infrared | Unburned HC               | 0-20000 ppm Vol | 1 ppm             |
|                                 | Electrochemical         | NO <sub>x</sub>           | 0-5000 ppm Vol  | 1 ppm             |
| <b>Smoke opacimeter</b>         | Photodiode detector     | Opacity %                 | 0-100%          | 0.10%             |

**Table 5: List of the accuracy of measuring component and the uncertainty**

| <b>Measured components</b> | <b>Measurement techniques</b> | <b>Measuring range</b> | <b>Accuracy</b> | <b>Uncertainty</b> |
|----------------------------|-------------------------------|------------------------|-----------------|--------------------|
| Load                       | Strain gauge type load cell   | 0-600 N m              | ±0.1 N m        |                    |
| Speed                      | Magnetic pick up type         | 0-6000 rpm             | ±1 rpm          |                    |
| Time                       | -                             | -                      | ±0.1 s          |                    |

|                       |                                             |                   |                  |                 |
|-----------------------|---------------------------------------------|-------------------|------------------|-----------------|
| Fuel flow measurement | Positive displacement gear wheel flow meter | 0.5–36 liter /hr. | ±0.04 liter /hr. |                 |
| Pressure sensor       | Piezoelectric crystal type                  | 0-25,000 kPa      | ±10 kPa          | ±0.5            |
| Crank angle encoder   | Incremental optical encoder                 | 0-12,000 rpm      | ±0.125°          | ±0.03           |
| CO                    | Non-dispersive infrared                     | 0–10% by vol.     | 0.01 vol.%       | ±0.01 vol.%     |
| HC                    | Non-dispersive infrared                     | 0-20000 ppm       | ±1 ppm vol.      | ±1 ppm          |
| NO <sub>x</sub>       | Electrochemical                             | 0-5000 ppm        | ±1 ppm vol.      | ±1 ppm          |
| Smoke opacity         | Photodiode detector                         | 0–100%            | 0.1%             | ±0.5%           |
| BSFC                  |                                             |                   |                  | ± 0.33 g /kW-hr |
